# Supplementary material for: Antioxidant, Enzyme, and H2O2-Triggered Melanoma Targeted Mesoporous Organo-Silica Nanocomposites for Synergistic Cancer Therapy
Source: MDPI journal article supplement (doi:10.3390/antiox11112137), 2022-10-28
Supplement: s1 [file s1]

## SUPPLEMENTARY MATERIALS

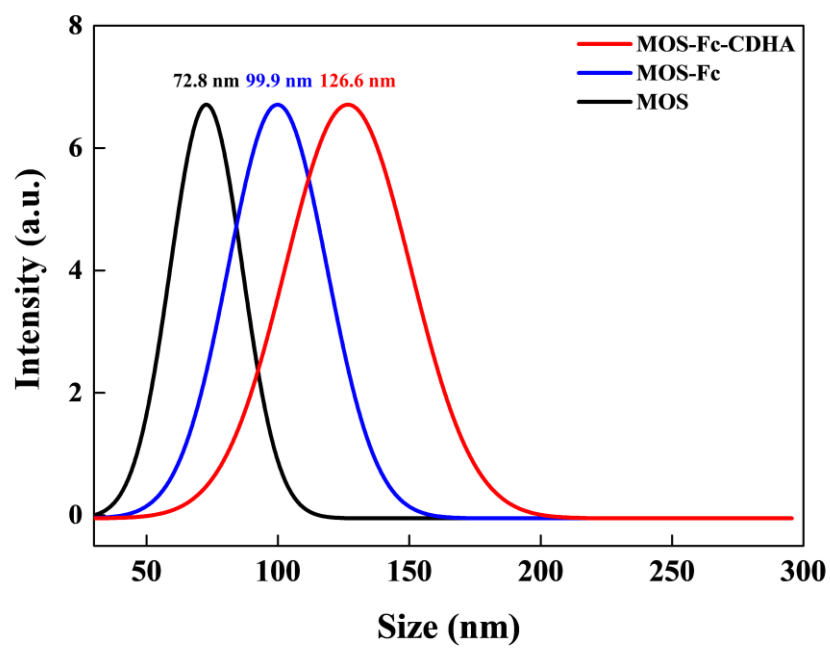

**Figure S1.** Size distribution of MOS, MOS-Fc, and MOS-Fc-CDHA nanocomposites

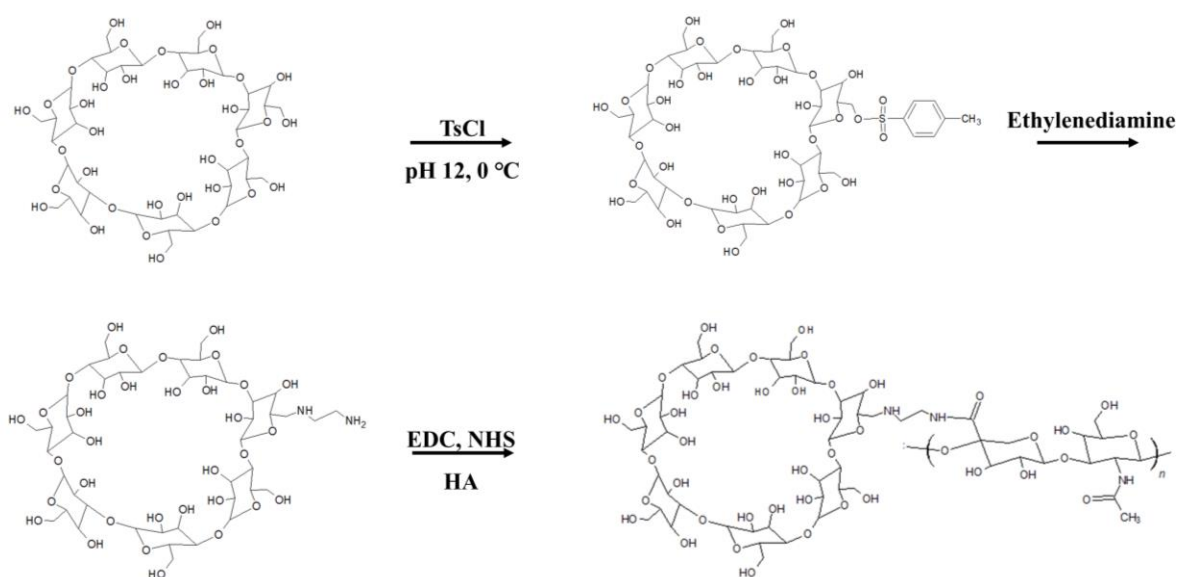

**Scheme S1.** Synthesis proecess of melanoma targeted and stimuli-responsive CDHA gatekeeper

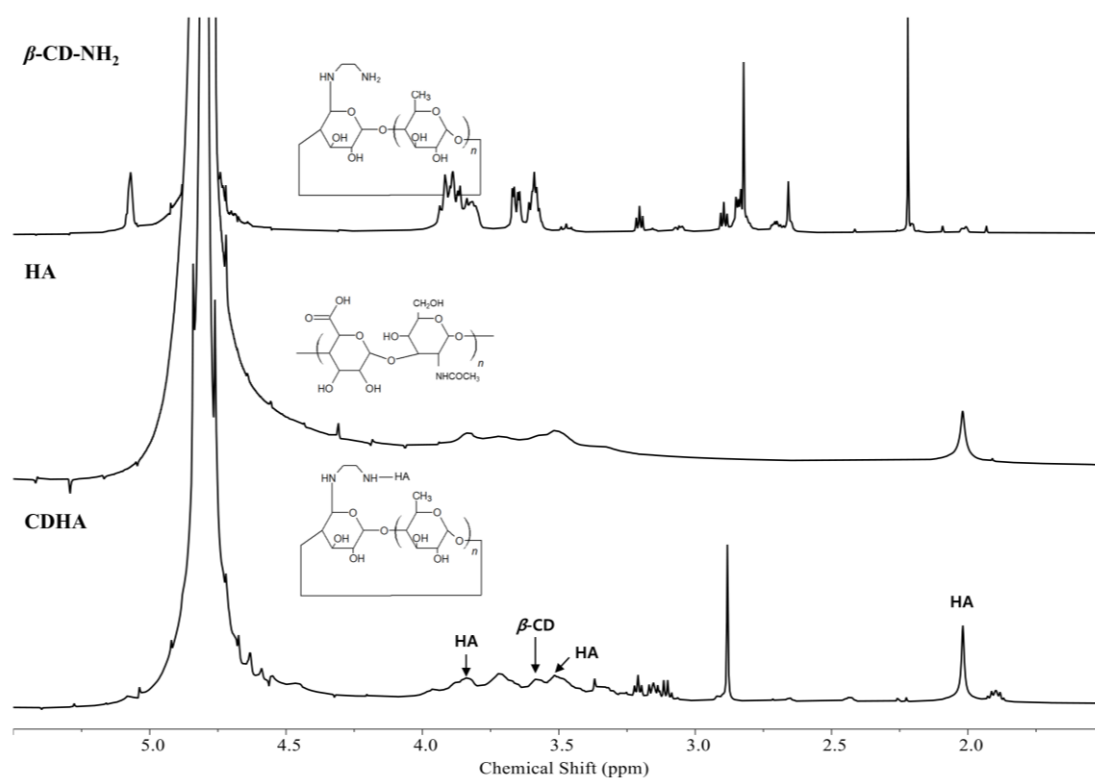

**Figure S2.**  $^1\text{H}$  NMR spectra of  $\beta\text{-CD-NH}_2$ , HA, and CDHA gatekeeper

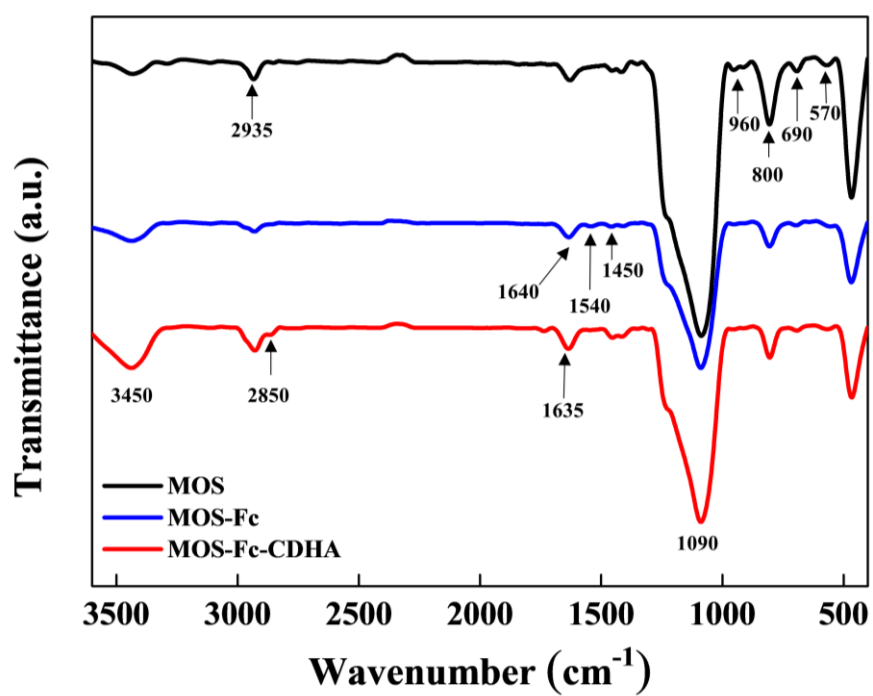

**Figure S3.** FTIR spectra of MOS, MOS-Fc, and MOS-Fc-CDHA nanocomposites.

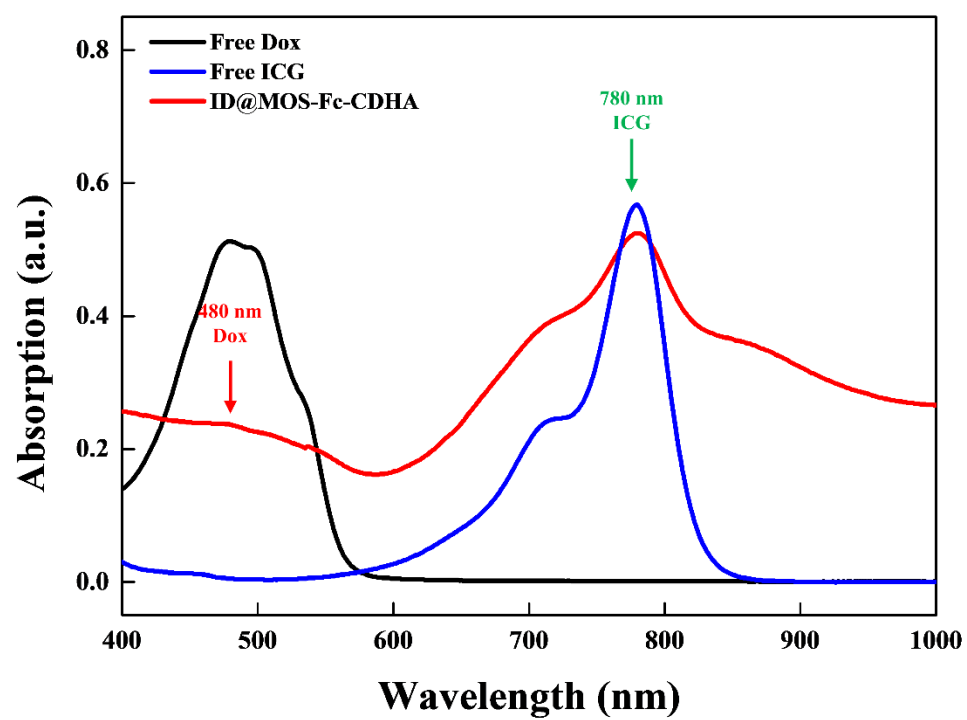

**Figure S4.** UV-vis spectra of free ICG, free Dox, and ID@MOS-Fc-CDHA nanocomposites.

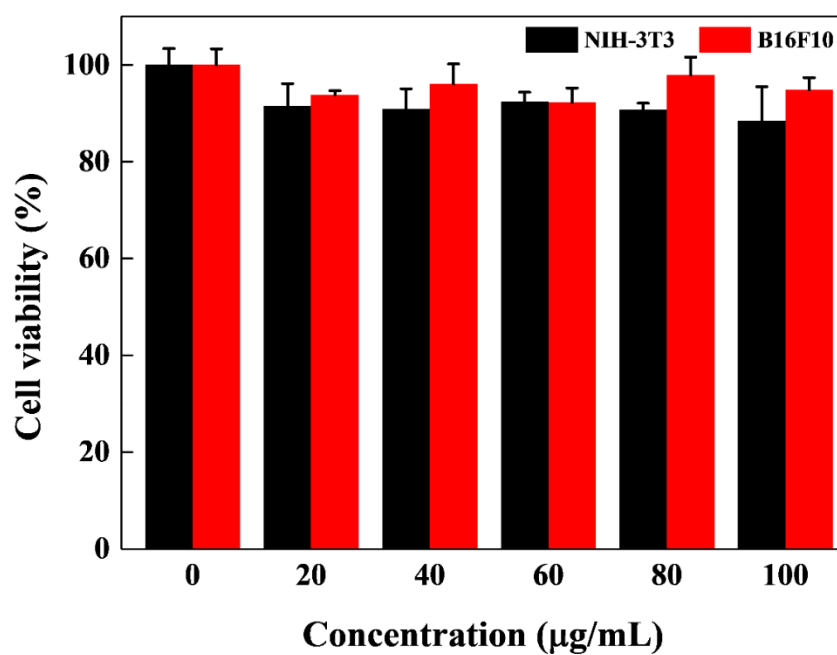

**Figure S5.** Cytotoxicity analysis of MOS-Fc-CDHA nanocomposites against NIH-3T3 fibroblast and B16F10 melanoma cells.
